# Supplementary material for: Evaluating Dietary Patterns in Women from Southern Italy and Western Mexico
Source: Nutrients. 2022 Apr 12;14(8):1603. doi: 10.3390/nu14081603 (PMC9027885; doi:10.3390/nu14081603)
Supplement: Supplementary file 1 [file nutrients-14-01603-s001.zip › nutrients-1660579-supplementary.pdf]

## Supplementary Material

**Table S1.** Medium or standard portion size of foods included in the food frequency questionnaire used for Italian women.

| 95 Food Items              | Portion (grams) |
|----------------------------|-----------------|
| Apple                      | 150             |
| Apricot                    | 120             |
| Artichoke                  | 150             |
| Aubergine                  | 150             |
| Banana                     | 110             |
| Beef, veal, lamb meat      | 120             |
| Boiled potatoes            | 150             |
| Bresaola                   | 70              |
| Brioche                    | 80              |
| Butter and margarine       | 20              |
| Cake, pastries             | 70              |
| Candy                      | 20              |
| Canned fish                | 100             |
| Carrots                    | 100             |
| Cauliflower, broccoli      | 80              |
| Cereals                    | 30              |
| Cherries                   | 150             |
| Chocolate, snack chocolate | 30              |
| Cooked vegetables          | 150             |
| Cookies                    | 30              |
| Eggs                       | 120             |
| Fennel                     | 150             |
| Fesa, chicken breast       | 40              |
| Fish (high in fat)         | 150             |
| Fish (low in fat)          | 150             |
| Fish (medium in fat)       | 150             |
| Fresh tomatoes             | 150             |
| Fries                      | 150             |
| Fruit salad                | 150             |
| Full fat yoghurt           | 125             |
| Green bean                 | 150             |
| Green salad                | 100             |
| Ham (cooked or uncooked)   | 40              |
| Hard cheeses               | 50              |
| Horse meat                 | 120             |
| Ice cream                  | 100             |
| Jam, marmalade             | 10              |
| Ketchup                    | 10              |
| Kiwi                       | 150             |
| Legumes                    | 120             |
| Low fat yoghurt            | 125             |
| Mayonnaise                 | 10              |

|                                    |     |
|------------------------------------|-----|
| Melon, mango                       | 150 |
| Mortadella                         | 40  |
| Mushroom                           | 150 |
| Nuts                               | 15  |
| Offal                              | 60  |
| Olive oil                          | 30  |
| Orange, mandarin                   | 150 |
| Pasta                              | 60  |
| Pastry cream, pudding              | 30  |
| Peach, nectarine, prune            | 150 |
| Pear                               | 150 |
| Peas                               | 125 |
| Peppers                            | 150 |
| Pineapple                          | 100 |
| Pizza                              | 150 |
| Popcorn, pretzels                  | 15  |
| Pork meat                          | 120 |
| Red grape                          | 150 |
| Rice                               | 70  |
| Rusks, crackers                    | 30  |
| Rusks, wholemeal crackers          | 30  |
| Salami                             | 30  |
| Shellfish                          | 100 |
| Soft cheeses                       | 120 |
| Soup                               | 150 |
| Spinach                            | 150 |
| Strawberries                       | 150 |
| Vegetable oil                      | 30  |
| Watermelon                         | 200 |
| White grape                        | 150 |
| White meat                         | 100 |
| Wholemeal biscuits                 | 30  |
| Wholemeal bread                    | 100 |
| Wrapped potato chips               | 25  |
| Wurstel chicken                    | 50  |
| Wurstel pork                       | 50  |
| Zucchini, pumpkin                  | 150 |
| Spirits and other alcoholic drinks |     |
| Beer                               |     |
| Coffee                             |     |
| Multivitamin juice                 |     |
| Pineapple juice                    |     |
| Orange juice                       |     |
| Pear juice                         |     |
| Peach juice                        |     |
| Whole milk                         |     |
| Semi-skimmed milk                  |     |
| Skimmed milk                       |     |

Portion sizes were indicated through a photographic atlas showing different life-size cups and glasses

Tea  
Energy drinks  
Red wine  
Rosè wine, white wine  
Water

---

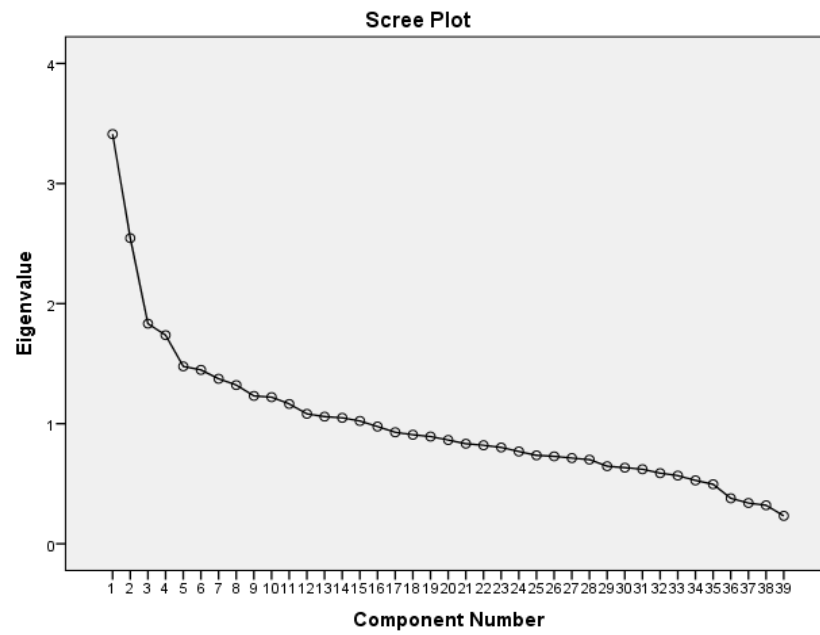

**Figure S1.** Scree plot of the eigenvalues of components extracted from Italian women's food frequency questionnaire data.

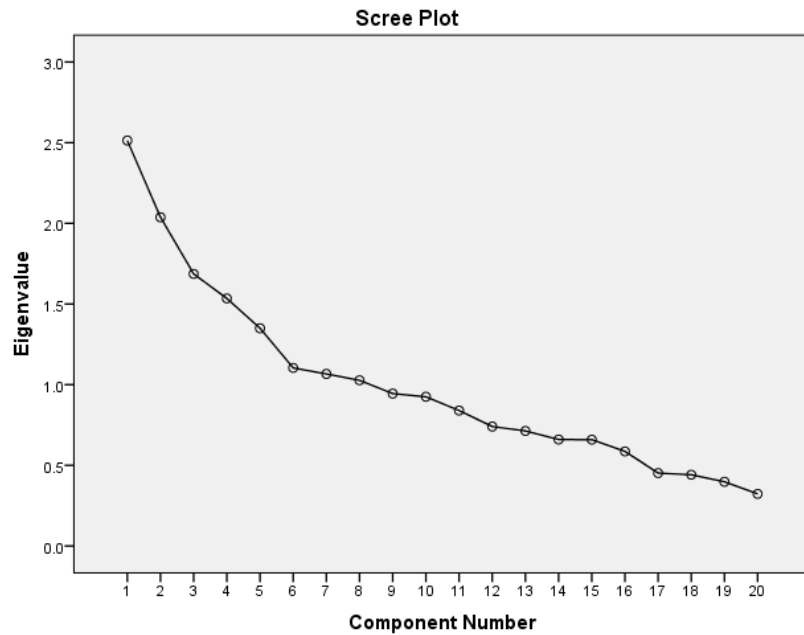

**Figure S2.** Scree plot of the eigenvalues of components extracted from Mexican women's food frequency questionnaire data.

**Table S2.** Factor loading matrix of main dietary patterns identified in Italian women.

| Food groups                  | Dietary patterns                  |                                            |
|------------------------------|-----------------------------------|--------------------------------------------|
|                              | Legumes, vegetables and fish, DP1 | Snack foods, processed meats and oils, DP2 |
| Pasta                        | 0.030                             | 0.001                                      |
| Potatoes                     | <b>0.622</b>                      | 0.188                                      |
| Rice                         | 0.182                             | -0.002                                     |
| Wholegrain bread and cereals | -0.062                            | -0.130                                     |
| Bread and cereals            | -0.097                            | 0.178                                      |
| Legumes                      | <b>0.860</b>                      | -0.075                                     |
| Fruit                        | 0.112                             | -0.118                                     |
| Fruit salad                  | -0.065                            | 0.074                                      |
| Cooked vegetables            | <b>0.734</b>                      | 0.012                                      |
| Vegetable soup               | <b>0.665</b>                      | -0.156                                     |
| Raw vegetables               | <b>0.330</b>                      | -0.058                                     |
| Red meat                     | 0.030                             | <b>0.358</b>                               |
| White meat                   | 0.065                             | 0.159                                      |
| Eggs                         | -0.033                            | 0.028                                      |
| Fish                         | <b>0.238</b>                      | -0.066                                     |
| Canned fish                  | -0.077                            | 0.103                                      |
| Shellfish                    | 0.047                             | 0.016                                      |
| Milk                         | 0.019                             | 0.003                                      |
| Yoghurt                      | -0.035                            | -0.103                                     |
| Ripened cheese               | 0.015                             | 0.007                                      |
| Curd cheese                  | 0.003                             | 0.020                                      |

|                      |        |              |
|----------------------|--------|--------------|
| Vegetable oils       | -0.049 | <b>0.436</b> |
| Olive oil            | -0.068 | -0.121       |
| Dipping sauces       | -0.018 | <b>0.655</b> |
| Processed meat       | -0.109 | <b>0.513</b> |
| Offal                | -0.003 | -0.041       |
| Butter and margarine | 0.016  | 0.083        |
| Pizza                | 0.168  | -0.021       |
| Chips                | 0.124  | <b>0.679</b> |
| Nuts                 | -0.026 | 0.003        |
| Breakfast cereals    | 0.076  | -0.032       |
| Sugar, sweets        | -0.148 | <b>0.216</b> |
| Snacks               | -0.166 | <b>0.576</b> |
| Fruit juice          | 0.043  | <b>0.210</b> |
| Tea                  | 0.068  | -0.001       |
| Coffee               | -0.005 | -0.011       |
| Wine                 | -0.012 | 0.157        |
| Alcoholic drinks     | -0.043 | 0.042        |
| Beer                 | -0.085 | 0.090        |

Food groups representative of dietary patterns according to a factor loading value of  $\geq 0.20$  are in bold. DP, dietary pattern.

**Table S3.** Factor loading matrix of main dietary patterns identified in Mexican women.

| Food groups       | Dietary patterns                  |                                             |
|-------------------|-----------------------------------|---------------------------------------------|
|                   | Meats and processed foods,<br>DP1 | Fruits, vegetables and whole grains,<br>DP2 |
| Tortilla          | -0.037                            | 0.003                                       |
| Whole grains      | 0.039                             | <b>0.208</b>                                |
| Legumes           | 0.011                             | 0.094                                       |
| Fruits            | -0.037                            | <b>0.788</b>                                |
| Vegetables        | -0.074                            | <b>0.767</b>                                |
| Red meat          | <b>0.815</b>                      | -0.122                                      |
| Chicken           | <b>0.486</b>                      | 0.043                                       |
| Pork              | <b>0.790</b>                      | -0.014                                      |
| Fish              | <b>0.398</b>                      | 0.137                                       |
| Sea food          | -0.026                            | 0.072                                       |
| Milk and dairy    | 0.019                             | -0.163                                      |
| Vegetable oils    | 0.142                             | -0.082                                      |
| Processed meat    | <b>0.358</b>                      | -0.090                                      |
| Butter, margarine | -0.026                            | 0.031                                       |
| Fried foods       | 0.037                             | -0.424                                      |
| Nuts              | -0.370                            | 0.103                                       |
| Soft drinks       | <b>0.250</b>                      | -0.147                                      |
| Coffee            | 0.021                             | -0.107                                      |
| Baked goods       | 0.105                             | 0.018                                       |
| Sugar, sweets     | -0.053                            | 0.092                                       |

Food groups representative of dietary patterns according to a factor loading value of  $\geq 0.20$  are in bold. DP, dietary pattern.
